# Supplementary material for: Comprehensive Evaluation of PAXgene Fixation on Oral Cancer Tissues Using Routine Histology, Immunohistochemistry, and FTIR Microspectroscopy
Source: MDPI journal article supplement (doi:10.3390/biom11060889), 2021-06-15
Supplement: s1 [file s1]

**Supplementary Information****Supplementary Tables****Table S1.** Percentage loss of tissue area from epithelium and sub-epithelium regions due to tissue tear or wrinkling

| Mean Percentage Loss of Tissue | Epithelium |          | Sub-Epithelium |          |
|--------------------------------|------------|----------|----------------|----------|
|                                | FFPE-NOM   | PFPE-NOM | FFPE-NOM       | PFPE-NOM |
|                                | n = 13*    | n = 17*  | n = 13*        | n = 17*  |
| Area                           | 4.08       | 2.09     | 28.7           | 19.1     |
| SEM                            | 0.974      | 0.302    | 3.91           | 2.75     |

\* Represents the number of samples excluding the samples lost due to tissue fall-off from slides

Abbreviations: FFPE, formalin-fixed paraffin embedded; PFPE, PAXgene-fixed paraffin embedded; NOM, normal oral mucosa; SEM, standard error of mean

**Table S2.** Experimental Conditions Used for Optimization of Antigen Retrieval for Immunohistochemistry Application

|   | Temperature Conditions                      | Instrument used | Cases of tissue fall-off/ Total number of FFPE-NOM samples | No. of samples left for IHC | Antigen Retrieved                 |
|---|---------------------------------------------|-----------------|------------------------------------------------------------|-----------------------------|-----------------------------------|
| 1 | 65 °C for 20 minutes<br>98 °C for 2 minutes | Microwave       | 17/20                                                      | 3                           | Yes                               |
| 2 | 65 °C for 30 minutes                        | Microwave       | 15/20                                                      | 5                           | Yes                               |
| 3 | 98 °C for 5 minutes                         | Microwave       | 15/20                                                      | 5                           | Partial or inconsistent retrieval |
| 4 | 98 °C for 10 minutes                        | Microwave       | 20/20                                                      | 0                           | Not applicable                    |
| 5 | 60 °C for 30 minutes                        | Microwave       | 10/20                                                      | 10                          | Partial or inconsistent retrieval |
| 6 | 98 °C for 10 minutes                        | Water bath      | 20/20                                                      | 0                           | Not applicable                    |
| 7 | 65 °C for 30 minutes                        | Water bath      | 4/20                                                       | 16                          | Yes                               |
| 8 | 60 °C for 30 minutes                        | Water bath      | 0/20                                                       | 20                          | Partial or inconsistent retrieval |

Abbreviations: FFPE, formalin-fixed paraffin embedded; NOM, normal oral mucosa; IHC, immunohistochemistry; °C, degree Celsius

**Table S3.** Documentation of cases of tissue section fall-off from slides during sample processing steps for immuno-histochemical staining experiments for PFPE tissue *without antigen retrieval*

|                                                       | Number of NOM<br>samples | Number of OSCC<br>samples |
|-------------------------------------------------------|--------------------------|---------------------------|
| <b>Total number of PFPE tissues</b>                   | 20                       | 20                        |
| Cases of tissue fall-off after D or R steps           | 2                        | 1                         |
| Total cases of tissue fall off                        | 2                        | 1                         |
| Number of cases left for IHC experiments              | 18                       | 19                        |
| <b>Percentage of tissues left for IHC experiments</b> | <b>90</b>                | <b>95</b>                 |

Abbreviations: FFPE, formalin-fixed paraffin embedded; PFPE; PAXgene-fixed paraffin embedded; NOM, normal oral mucosa; IHC, immunohistochemistry

## Supplemental Methods

### **Method S1. Immunohistochemistry**

#### Stepwise laboratory protocol of immunohistochemistry with PFPE and FFPE oral buccal mucosa tissues

##### *Material Required:*

1. AUTOFROST Adhesion Microscope Slides (Cancer Diagnostics Inc. #20190710)
2. FFPE and PFPE oral buccal mucosa tissue slides.
3. Immunohistochemistry (IHC) kit (DAKO #K8023)
4. Tris buffered saline (TBS): 50 mM Tris-Cl, pH 7.5, 150 mM NaCl
5. Tris EDTA buffer pH 9(antigen retrieval buffer): 10mM Tris Base, 1mM EDTA Solution, 0.05% Tween 20, pH 9.0
6. DPX Mountant for histology (Sigma Aldrich # 44581)

##### *Methods:*

##### **Deparaffinization**

1. Bake the slides with tissue sections for 30 minutes at 65°C incubator
2. Immerse the slides with tissue sections in xylene with two changes for 10 minutes each

##### **Rehydration**

3. Rehydrate the slides with tissue sections in decreasing gradient of alcohol.
  - 100% ethanol: 2 minutes
  - 90% ethanol: 2 minutes
  - 70% ethanol: 2 minutes

- 50% ethanol: 2 minutes
- Immerse the slides in MilliQ water for few seconds

#### Wash

4. Immerse the slide with tissue sections in TBS and wash 3X for 5 minutes.

#### Antigen Retrieval

5. Immerse the slides with tissue sections in Tris-EDTA buffer, pH 9.
6. Antigen retrieval of tissue sections was performed at 65°C for 30 minutes in a water bath.
7. Let the slides with tissue sections cool down for 20 minutes.

#### Wash

8. Immerse the slide with tissue sections in TBS and wash 3X for 5 minutes.

#### Peroxide Block

9. Add 50-100 ul of DAKO Peroxide block from the IHC kit (ready to use) to the sections and incubate for 10 minutes.

#### Wash

10. Immerse the slide with tissue sections in TBS and wash 3X for 5 minutes.

#### Primary Antibody Incubation

11. Dilute the primary antibody in 1% BSA in TBS as per manufacturer's instructions. (p53:1:500; CK5/6, 1:500) in 1%BSA+TBS)
12. Add 50-100 of primary antibody to the tissue sections and incubate for 2.5 hours.

#### Wash

13. Immerse the slide with tissue sections in TBS and wash 3X for 5 minutes.

#### Secondary Antibody Incubation

14. Add 50-100 ul of EnVision™ FLEX /HRP (ready to use) to the tissue sections and incubate for 1 hour.

#### Wash

15. Immerse the slide with tissue sections in TBS and wash 3X for 5 minutes.

#### Chromogenic Reaction

16. Mix 10 ul of DAB chromogen in 1000ul of EnVision™ FLEX Substrate Buffer and add 50-100 ul of the mixture on the tissue sections and incubate till color appears. This step was performed under the bright-field microscope.
17. Optimization of the timing of the color reaction should be performed for each antibody used (p53; 2.5 minutes and CK5/6; 1 minute).

#### Wash

18. Immerse the slide with tissue sections in TBS and wash 3X for 5 minutes.

#### Counterstain

19. Counterstain the tissue sections with hematoxylin for 20 seconds

#### Wash

20. Wash the tissue sections with tap water for 2 minutes

#### Dehydration and Mounting

21. Dehydrate the tissue sections by immersing the slides in increasing gradient of alcohol.
  - 70% ethanol for 2 minutes
  - 100% ethanol for 2 minutes
22. Mount the slides with DPX mountant.
